# Supplementary material
Source: publisher figshare collection journal article supplement (https://gsajournals.figshare.com/ndownloader/files/25065974)
Supplement: Supplementary file 1 [file 25065974]

## Sheet: Blad2
Table S1 Heritability of disease status for different susceptibility genetic variances
	1		0.75		0.5		0.25
	0.3	.020 ± .0008	0.3	.020 ± .0007	0.3	.019 ± .0007	0.3	.017 ± .0007
	0.5	.051 ± .0017	0.5	.047 ± .0016	0.5	.045 ± .0016	0.55	.045 ± .0017
	0.75	.096 ± .0031	0.75	.095 ± .0031	0.85	.097 ± .0033	1.1	.094 ± .0035
Heritability estimates for binary disease status ( ) for additive proportions of the susceptibility variance ( )
of 0.25, 0.50, 0.75, and 1 and different genetic standard deviations in susceptibility ( ), corresponding to the values in Table 2.
Shown values for are means of 20 replicates with their standard errors.
